# Supplementary material
Source: publisher figshare collection journal article supplement (https://tandf.figshare.com/ndownloader/files/15157916)
Supplement: Supplementary file 1 [file 15157916]

Supplementary Table 1. Demographic characteristics of study participants and laboratory test results.

| Dose groups | 20 mg (n=8), mean (SD) | | |  | 40 mg (n=10), mean (SD) | | |  | 60 mg (n=8), mean (SD) | | |
| --- | --- | --- | --- | --- | --- | --- | --- | --- | --- | --- | --- |
| Sex | Female | Male | Total |  | Female | Male | Total |  | Female | Male | Total |
| Age (years) | 35.0 (1.6) | 33.8 (1.5) | 34.4 (1.6) |  | 33.0 (3.1) | 33.0 (0.7) | 33.0 (2.1) |  | 35.8 (1.0) | 30.8 (1.5)& | 33.3 (2.9) |
| Height (cm) | 162.3 (3.2) | 173.0 (2.5) | 167.6 (6.3) |  | 163.0 (5.7) | 173.6 (5.0) | 168.3 (7.5) |  | 164.0 (5.6) | 174.5 (4.0) | 169.3 (7.2) |
| Weight (kg) | 55.5 (6.5) | 64.0 (3.3) | 59.8 (6.6) |  | 53.4 (3.2) | 63.2 (5.2) | 58.3 (6.6) |  | 57.3 (7.9) | 66.0 (5.0) | 61.6 (7.7) |
| BMI (kg/m2) | 21.0 (1.7) | 21.4 (0.7) | 21.2 (1.2) |  | 20.1 (0.4) | 21.0 (1.1) | 20.5 (0.9) |  | 21.2 (1.6) | 21.7 (1.4) | 21.4 (1.4) |
| RBC (1012/L) | 4.8 (0.1) | 5.3 (0.2) | 5.0 (0.3) |  | 4.7 (0.4) | 5.4 (0.2) | 5.0 (0.5) |  | 5.0 (0.4) | 4.8 (0.4) | 4.9 (0.4) |
| Hb (g/L) | 142.0 (4.6) | 158.0 (3.5) | 150.0 (9.3) |  | 144.0 (6.6) | 157.2 (7.2) | 150.6 (9.5) |  | 151.3 (11.9) | 150.0 (15.7) | 150.6 (12.9) |
| WBC (109/L) | 6.9 (1.7) | 5.2 (0.9) | 6.0 (1.6) |  | 6.3 (1.5) | 4.6 (0.4) | 5.4 (1.4) |  | 4.9 (0.7) | 5.2 (0.9) | 5.0 (0.7) |
| PLT (109/L) | 195.3 (23.9) | 178.5 (14.1) | 186.9 (20.2) |  | 209.6 (60.3) | 165.2 (26.9) | 187.4 (49.9) |  | 213.5 (31.3) | 175.8 (28.8) | 194.6 (34.4) |
| ALT (g/L) | 20.0 (9.3) | 36.3 (5.6) | 28.1 (11.2) |  | 16.0 (11.6) | 19.2 (10.4) | 17.6 (10.5) |  | 16.3 (4.9) | 26.0 (15.6) | 21.1 (11.9) |
| AST (g/L) | 23.5 (3.0) | 28.5 (1.0) | 26.0 (3.4) |  | 14.8 (9.4) | 18.2 (11.4) | 16.5 (10.0) |  | 23.5 (1.9) | 25.5 (3.3) | 24.5 (2.7) |
| Cr (mmol/L) | 75.3 (10.1) | 96.0 (16.1) | 85.6 (16.6) |  | 71.4 (6.0) | 82.6 (5.6) | 77.0 (8.1) |  | 90.5 (9.0)* | 88.0 (13.2) | 89.3 (10.6) |
| BUN (mmol/L) | 4.5 (1.1) | 5.4 (0.6) | 4.9 (1.0) |  | 4.4 (0.8) | 5.2 (0.8) | 4.8 (0.9) |  | 6.1 (0.3) | 5.6 (0.8) | 5.8 (0.7) |

**P* < 0.05, 60 mg versus 40 mg for female; &*P* < 0.05, 60 mg versus 20 mg for male.

Supplementary Table 2. Sex-related differences in pharmacokinetic parameters after single and multiple intravenous infusion of injectable ginkgolide B in healthy Chinese subjects.

| Parameters |  |  | |  | 40 mg | | | | |  |  |  |
| --- | --- | --- | --- | --- | --- | --- | --- | --- | --- | --- | --- | --- |
|  | 20 mg Single dose | | |  | Single dose | |  | Multiple dose | |  | 60 mg Single dose | |
|  | Female (n=4) | | Male (n=4) |  | Female (n=5) | Male (n=5) |  | Female (n=5) | Male (n=5) |  | Female (n=4) | Male (n=4) |
| t1/2 (h) | 5.4 ± 0.3 | 6.1 ± 1.5 | |  | 5.3 ± 1.4 | 6.0 ± 1.1 |  | 7.4 ± 2.6 | 6.4 ± 2.4 |  | 7.2 ± 2.2 | 7.1 ± 2.2 |
| Tmax (h) | 1.9 ± 0.5 | 2.0 ± 0.4 | |  | 3.0 ± 0.0 | 3.3 ± 0.5 |  | 3.0 ± 0.0 | 2.8 ± 0.5 |  | 3.5 ± 0.6 | 3.0 ± 0.0 |
| CL (L/h) | 106.2 ± 10.9 | 151.5 ± 42.1 | |  | 81.2 ± 29.5 | 84.8 ± 14.9 |  | 58.3 ± 9.0 | 62.2 ± 12.1 |  | 52.7 ± 10.8 | 44.8 ± 3.5 |
| Vd (L) | 818.3 ± 65.1 | 1277.5 ± 160.0* | |  | 623.0 ±269.5 | 738.6 ± 216.2 |  | 596.8 ± 134.9 | 545.8 ± 135.2 |  | 524.3 ± 54.3 | 464.5 ± 147.9 |
| Cmax (µg·L-1) | 33.9 ± 5.9 | 25.0 ± 7.2 | |  | 92.0 ± 26.2 | 63.4 ± 9.9 |  | 104.8 ± 9.1 | 79.8 ± 16.6* |  | 144.5 ± 24.4 | 174.0 ± 5.6 |
| AUC0-t (µg/L*h) | 184.7 ± 16.6 | 130.7 ± 30.7* | |  | 529.6 ±189.4 | 462.2 ± 80.4 |  | 647.1 ± 74.2 | 612.4 ± 77.3 |  | 1094.9 ± 175.1 | 1272.1 ± 119.8 |
| AUC0-∞ (µg/L*h) | 189.8 ± 17.8 | 138.8 ± 32.9* | |  | 544.0 ± 190.3 | 483.7 ± 87.1 |  | 699.7 ± 111.9 | 659.8 ± 108.1 |  | 1174.8 ± 239.3 | 1345.4 ± 106.0 |
| MRT(h) | 5.9 ± 0.3 | 6.8 ± 0.9 | |  | 6.9 ± 0.6 | 7.6 ± 0.8 |  | 7.6 ± 0.5 | 8.2 ± 1.0 |  | 8.1 ± 0.6 | 7.8 ± 0.4 |
| Cmin (µg·L-1) |  |  | |  |  |  |  | 4.4 ± 1.2 | 6.5 ± 1.7* |  |  |  |
| Cav (µg·L-1) |  |  | |  |  |  |  | 47.9 ± 4.1 | 42.0 ± 8.4 |  |  |  |
| DF |  |  | |  |  |  |  | 2.1 ± 0.1 | 1.8 ± 0.1* |  |  |  |
| AUCSS (µg/L*h) | |  | |  |  |  |  | 383.3 ± 32.6 | 335.9 ± 67.3 |  |  |  |

Cmin, the minimum value of the steady plasma drug concentration;

AUCss, area under the plasma concentration-time curve of the steady state;

**P* < 0.05, comparison was performed at the same dose levels.
